# Supplementary material for: Induction of Trained Innate Immunity in Human Monocytes by Bovine Milk and Milk-Derived Immunoglobulin G
Source: MDPI journal article supplement (doi:10.3390/nu10101378), 2018-09-27
Supplement: s1 [file s1]

## Supplementary

**Table S1.** Trained immunity induced per training stimulus, compared to non-trained cells. after TLR7/8 (R848) stimulation (IL-6 production).

| donor    | $\beta$ -glucan | Raw milk | Bovine lactoferrin | Bovine IgG |
|----------|-----------------|----------|--------------------|------------|
| 1        | +               | +        | +                  | +          |
| 2        | +               | +        | +                  | +          |
| 3        | +               | -        | +                  | +          |
| 4        | +               | +        | 0                  | +          |
| 5        | +               | +        | -                  | +          |
| 6        | -               | 0        | -                  | -          |
| 7        | +               | 0        | 0                  | +          |
| 8        | +               | +        | -                  | +          |
| 9        | +               | +        |                    | +          |
| 10       | +               | -        | -                  | -          |
| 11       | +               | +        | -                  | +          |
| 12       | 0               | -        | -                  | -          |
| Training | 10/12           | 7/12     | 3/11               | 9/12       |

+: >10% higher IL-6 production of training stimulus compared to non-trained cells: trained immunity; -: <-10% lower IL-6 production of training stimulus compared to non-trained cells: tolerance. 0: comparable (-10 < % < 10%) IL-6 production of training stimulus compared to non-trained cells.

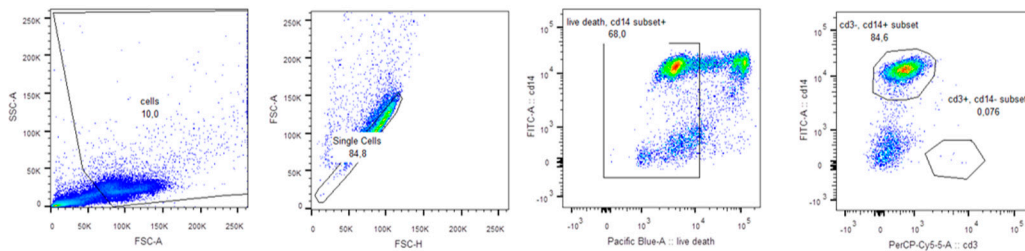

**Figure S1.** Gating strategy and purity of isolated monocytes (84.6%). Staining was performed with live/death staining, CD3 and CD14.

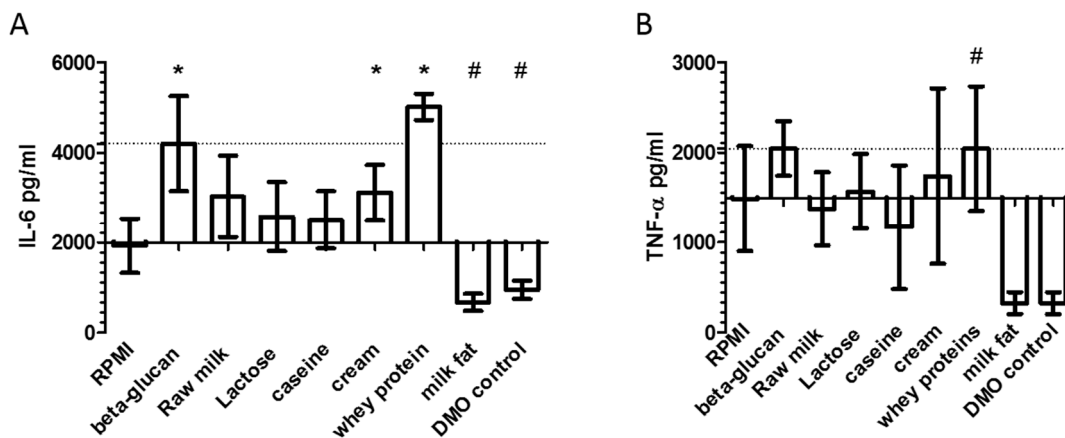

**Figure S2.** Induction of trained immunity or tolerance is dependent on the training of monocytes. Monocytes were stimulated 24 h in the presence or absence of  $\beta$ -glucan (1  $\mu$ g/mL), Pam3Cysk4 (10  $\mu$ g/mL), LPS (0.1  $\mu$ g/mL), or R848 (10  $\mu$ g/mL); after five days of

rest the differentiated macrophages were stimulated for 24 h with R848 (10  $\mu\text{g/mL}$ ). After stimulation with R848, the produced IL-6 and TNF- $\alpha$  (pg/mL) was measured in the supernatant. Data is shown as mean  $\pm$  SEM, with the IL-6 and TNF- $\alpha$  production of non-trained cells (RPMI) as the  $x$ -axis. RPMI and  $\beta$ -glucan:  $n = 5$ ; TLR stimuli:  $n = 3$ . Data was statistically analysed using a paired  $t$ -test. \*  $p < 0.05$ .

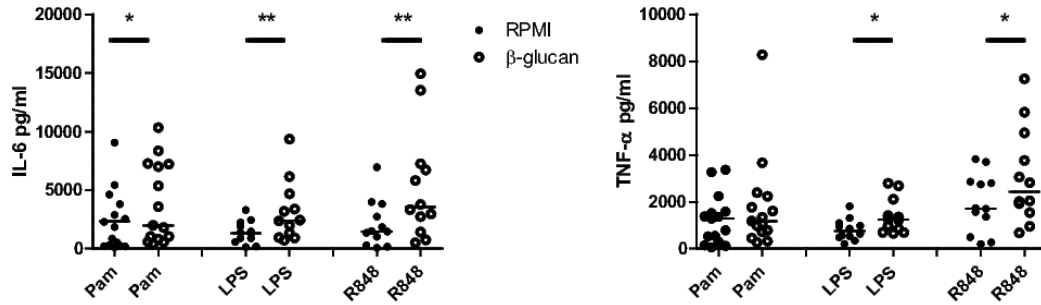

**Figure S3.** Induction of trained immunity by  $\beta$ -glucan. Monocytes were stimulated 24 h in the presence or absence of  $\beta$ -glucan (1  $\mu\text{g/mL}$ ); after five days of rest the differentiated macrophages were re-stimulated for 24 h with Pam3Cysk4 (Pam) (10  $\mu\text{g/mL}$ ), LPS (0.1  $\mu\text{g/mL}$ ), or R848 (10  $\mu\text{g/mL}$ ). After stimulation with R848 the produced IL-6 and TNF- $\alpha$  (pg/mL) was measured in the supernatant. In 5–6 independent experiments,  $n = 15$  (Pam) or  $n = 12$  (LPS, R848). Data shown as dot plot with median. Statistics was done by performing a Wilcoxon signed rank test between beta-glucan and RPMI for every secondary stimulation (Pam, LPS, R848). \*  $p < 0.05$ ; \*\*  $p < 0.01$ .

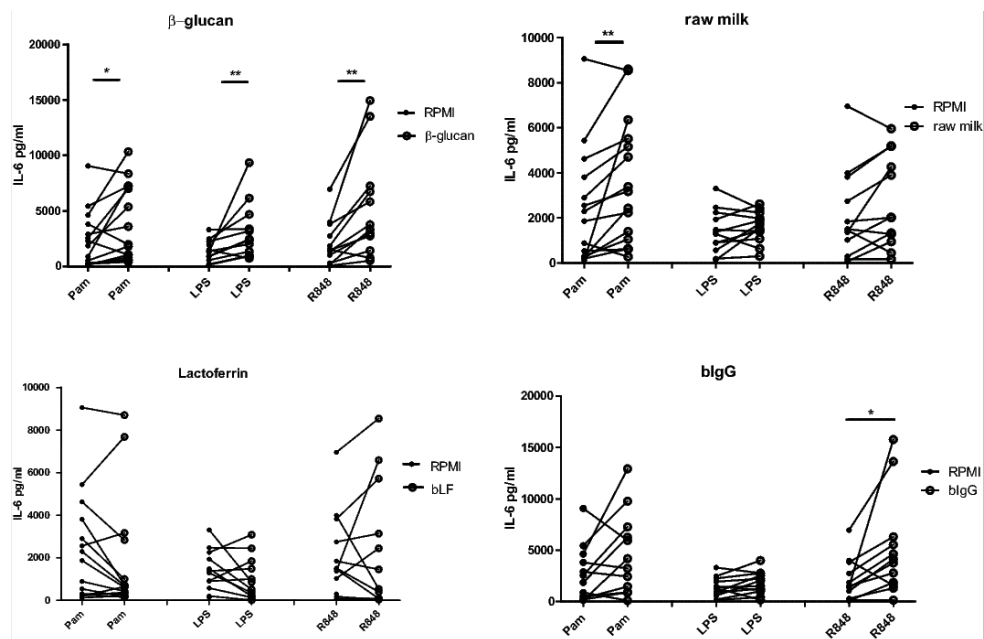

**Figure S4.** Paired analysis plots of monocytes trained with  $\beta$ -glucan, raw milk, bLF and blgG, and re-stimulated with Pam, LPS, or R848 at day six. In the supernatant of day seven, IL-6 (pg/mL) was measured.
